# Supplementary material for: Recent advances of catalytic hairpin assembly and its application in bioimaging and biomedicine
Source: Royal Society of Chemistry journal article supplement (doi:10.1039/d2tb00815g), 2022-01-01
Supplement: d2tb00815g1.pdf [file d2tb00815g1.pdf]

## Supporting Information

### Recent advances of catalytic hairpin assembly and its application in bioimaging and biomedicine

Ziyi Tian,<sup>†a</sup> Chen Zhou,<sup>†a</sup> Chuyan Zhang,<sup>a</sup> Mengfan Wu,<sup>b</sup> Yixiang Duan<sup>\*b</sup> and  
Yongxin Li<sup>\*a</sup>

<sup>a</sup> *West China School of Public Health and West China Fourth Hospital, Sichuan University, Chengdu 610041, China*

<sup>b</sup> *Research Center of Analytical Instrumentation, School of Mechanical Engineering, Sichuan University, Chengdu 610065, China*

## Table of Contents

|                                                                           |          |
|---------------------------------------------------------------------------|----------|
| <b>Table S1. Newly developed CHA strategies .....</b>                     | <b>3</b> |
| <b>Table S2. CHA integrated with other techniques .....</b>               | <b>5</b> |
| <b>Table S3. CHA-based biosensors for bioimaging and biomedicine.....</b> | <b>7</b> |
| <b>Reference.....</b>                                                     | <b>9</b> |

**Table S1.** Newly developed CHA strategies

| Newly developed CHA strategies              | Target                                                                 | Detection method          | Linear range             | LOD                                    | Ref |
|---------------------------------------------|------------------------------------------------------------------------|---------------------------|--------------------------|----------------------------------------|-----|
| bCHA with three-way junctions               | DNA                                                                    | Colorimetry               | 10-600 pM                | 7.7 pM                                 | 1   |
| bCHA with three-way junctions               | EGFR mutant DNA                                                        | Colorimetry               | 870 aM-87 pM             | 7.7 fM                                 | 2   |
| bCHA with three-way junctions               | DNA                                                                    | Colorimetry               | 0.01-5 pM                | 0.1 pM                                 | 3   |
| bCHA with three-way junctions               | DNA                                                                    | Colorimetry               | 0.02-1 pM                | 0.01 pM                                | 4   |
| bCHA with three-way junctions               | has-miR-143-3p,<br>has-miR-18b-5p,<br>has-miR-424-5p,<br>has-miR-93-5p | Colorimetry               | 0-100 pM                 | 5 pM                                   | 5   |
| bCHA with three-way junctions               | Cancer cells                                                           | Colorimetry               | 25-10 <sup>7</sup> cells | 10 cells                               | 6   |
| bCHA with three-way junctions               | DNA                                                                    | Fluorescent               | 100 pM-400 nM            | 10 pM                                  | 7   |
| bCHA with three-way junctions               | Bisphenol A                                                            | Fluorescent               | 10 fM-10 nM              | 5 fM                                   | 8   |
| bCHA with three-way junctions               | DNA, adenosine triphosphate                                            | Fluorescent               | 1 pM-100 nM              | 4.59×10 <sup>-13</sup> M               | 9   |
| bCHA with three-way junctions               | Hg <sup>2+</sup>                                                       | Fluorescent               | 10 pM-100 nM             | 4.5 pM                                 | 10  |
| bCHA with three-way junctions               | Hg <sup>2+</sup>                                                       | Fluorescent               | 50-1200 pM               | 25 pM                                  | 11  |
| bCHA with three-way junctions               | Exosomal microRNA-181                                                  | Electrochemistry          | 10 fM-100 nM             | 7.94 fM                                | 12  |
| bCHA with four-way junctions                | Nucleic acid biomarkers                                                | Colorimetry               | 100 aM-10 pM             | 100 aM                                 | 13  |
| bCHA with four-way junctions                | DNA                                                                    | Fluorescent               | Not shown                | Not shown                              | 14  |
| bCHA with four-way junctions                | Chloramphenicol (CAP), kanamycin (Kana)                                | Microchip electrophoresis | 0.001-40 ng/mL           | 0.52 pg/mL (CAP),<br>0.41 pg/mL (Kana) | 15  |
| bCHA with dendrimer-like DNA nanostructures | DNA                                                                    | Colorimetry               | 50-700 pM                | 9 pM                                   | 16  |
| C-CHA                                       | MicroRNA                                                               | Colorimetry               | 100 fM-10 nM             | 36.2 fM                                | 17  |
| C-CHA                                       | MicroRNA                                                               | ECL/<br>Electrochemistry  | 100 aM -100 pM           | 28.75 aM                               | 18  |

|       |                     |                  |                                                  |                                         |    |
|-------|---------------------|------------------|--------------------------------------------------|-----------------------------------------|----|
| C-CHA | MicroRNA            | Fluorescent      | Not shown                                        | Not shown                               | 19 |
| C-CHA | Cytokines           | Fluorescent      | 1 pM-50 nM                                       | 0.6 pM                                  | 20 |
| C-CHA | DNA, microRNA       | Fluorescent      | 1 pM -10 nM                                      | 0.67 pM                                 | 21 |
| SRCHA | DNA, small molecule | Colorimetry      | 10-500 pM                                        | 5 pM                                    | 22 |
| SRCHA | DNA                 | Fluorescent      | 1-60 nM                                          | 58 pM                                   | 23 |
| SRCHA | Cd <sup>2+</sup>    | Fluorescent      | 10 pM -100 mM                                    | 5 pM                                    | 24 |
| SRCHA | Aflatoxin B1        | Fluorescent      | 0.30-15 ng/mL                                    | 0.13 ng/mL                              | 25 |
| SRCHA | ATP                 | Fluorescent      | 20-1000 nM                                       | 7 nM                                    | 26 |
| LCHA  | MicroRNA            | Fluorescent      | Not shown                                        | 2.0 pM                                  | 27 |
| LCHA  | MiRNA-21            | Fluorescent      | 100 pM- 10 nM                                    | 58.1 pM                                 | 28 |
| LCHA  | MicroRNAs           | Fluorescent      | Not shown                                        | Not shown                               | 29 |
| LCHA  | Messenger RNA       | Fluorescent      | Not shown                                        | Not shown                               | 30 |
| LCHA  | Exosomal microRNA   | Electrochemistry | 10 aM -100 pM                                    | 7.2 aM                                  | 31 |
| DCHA  | MicroRNAs           | ECL              | 50 aM-1 nM (miRNA-21) , 20 nM (miRNA-155)        | 14.8 aM (miRNA-21) , 5.3 aM (miRNA-155) | 32 |
| DCHA  | MiRNA-21 and MUC1   | ECL              | 20 aM-50 pM (miRNA-21) , 1 fg/mL-10 ng/mL (MUC1) | 11 aM (miRNA-21) , 0.40 fg/mL (MUC1)    | 33 |

---

**Table S2.** CHA integrated with other techniques

| Combination Method                            | Target                        | Detection method      | Linear range       | LOD                                       | Ref. |
|-----------------------------------------------|-------------------------------|-----------------------|--------------------|-------------------------------------------|------|
| CHA& DNAzyme                                  | MicroRNA                      | Colorimetry           | 50 fM-50 nM        | 27 fM (Colorimetry)<br>500 fM (naked eye) | 34   |
| CHA& DNAzyme                                  | MicroRNA-182                  | Fluorescent           | 10 fM-10 nM        | 6.8 fM                                    | 35   |
| CHA& DNAzyme                                  | Human papillomavirus-16 DNA   | Fluorescent           | 10 pM-10 nM        | 5.7 pM                                    | 36   |
| CHA& double-end DNAzyme                       | HIV-1 DNA                     | Fluorescent           | 1 pM-2 nM          | 1 pM                                      | 37   |
| CHA& DNAzyme                                  | Telomerase Activity           | Fluorescent           | Not shown          | Not shown                                 | 38   |
| CHA&3D-Bipedal DNA Walker& DNAzyme            | Thrombin                      | Fluorescent           | 0.1 pM-5 nM        | 23 fM                                     | 39   |
| CHA&DNA nanonet                               | MicroRNA                      | Electrochemistry      | 10 fM-1 nM         | 3.6083 fM                                 | 40   |
| CHA& quadrivalent cruciform DNA nanostructure | Amyloid $\beta$ Oligomers     | Fluorescent           | 1 pM-100 nM        | 0.69 pM                                   | 41   |
| CHA& DNA Nanotweezer                          | MicroRNAs                     | Colorimetry           | 100 fM-10 nM       | 30 fM                                     | 42   |
| CHA& DNA Nanotweezer                          | MiRNA, uracil-DNA glycosylase | Fluorescent           | 0.1 pM-50 nM       | 8.7 fM                                    | 43   |
| CHA& DNA Nanotweezer                          | MicroRNA                      | Electrochemistry      | 1 fM-100 pM        | 0.32 fM                                   | 44   |
| CHA&HCR& DNAzyme                              | Carcinoembryonic antigen      | Photoelectrochemistry | 70 ag/mL-500 fg/mL | 70 ag/mL (measured detection limit)       | 45   |
| CHA&HCR& DNAzyme                              | MiRNA-21                      | Colorimetry           | 1.0-1000 pM        | 0.2 pM                                    | 46   |
| CHA&HCR                                       | Prostate-specific antigen     | Colorimetry           | 1-100 pg/ mL       | 1 pg/mL                                   | 47   |
| CHA&HCR                                       | MiR-21                        | Fluorescent           | 0-1 nM             | 2 pM                                      | 48   |
| CHA&HCR                                       | MiRNA                         | Fluorescent           | 0.02-20 nM         | 6.9 pM                                    | 49   |
| CHA&HCR                                       | 8-hydroxy-2'-deoxyguanosine   | Electrochemistry      | 100 fM -10 nM      | 24.34 fM                                  | 50   |
| CHA&HCR& alkaline phosphatase                 | MicroRNA                      | Photoelectrochemistry | 1 fM-1 nM          | 0.41 fM                                   | 51   |

|                                                                 |                                 |                           |                                                                                    |                                                      |    |
|-----------------------------------------------------------------|---------------------------------|---------------------------|------------------------------------------------------------------------------------|------------------------------------------------------|----|
| CHA&HCR                                                         | Single-Cell<br>microRNA         | Fluorescent               | Not shown                                                                          | 60 copies                                            | 52 |
| CHA&HCR&<br>DNAzyme                                             | Human<br>telomerase<br>RNA      | Photoelectroche<br>mistry | 200 fM -20.0 nM                                                                    | 17.0 fM                                              | 53 |
| LCHA&HCR                                                        | DENV gene                       | SERS                      | 1 fM- 10 nM                                                                        | 0.49 fM                                              | 54 |
| CHA&HCR&<br>alkaline phosphatase                                | Nucleic acids                   | Photoelectroche<br>mistry | 0.1 fM -100 pM                                                                     | 0.052 fM                                             | 55 |
| CHA&HCR&<br>DNAzyme                                             | Prostate<br>specific<br>antigen | Fluorescent               | 0.001-10 ng/mL                                                                     | 0.73 pg/mL                                           | 56 |
| CHA&RCA                                                         | DNA                             | Fluorescent               | 1-100 nM                                                                           | 0.84 nM                                              | 57 |
| CHA&RCA                                                         | MicroRNA                        | Electrochemistry          | 15 fM-250 pM                                                                       | 13.5 fM                                              | 58 |
| CHA&RCA                                                         | Nucleic acids                   | Fluorescent               | 4.0-10 aM                                                                          | 1.2 aM                                               | 59 |
| CHA&RCA&<br>exonuclease III                                     | Carcinoembry<br>onic antigen    | Electrochemistry          | 10 fg/mL-100 ng/mL                                                                 | 4.2 fg/mL                                            | 60 |
| CHA& bipedal DNA<br>walker& HCR&<br>DNAzyme&<br>exonuclease III | DNA                             | Electrochemistry          | 0.1 fM-100 pM                                                                      | 3.01 aM                                              | 61 |
| CHA&T7<br>exonuclease                                           | MicroRNA                        | Electrochemistry          | 1 fM-100 pM                                                                        | 200 aM                                               | 62 |
| CHA& duplex-<br>specific nuclease                               | MicroRNA                        | Electrochemistry          | 0-10 nM                                                                            | 25.1 aM                                              | 63 |
| CHA&duplex-<br>specific nuclease&<br>DNAzyme                    | MicroRNA                        | Colorimetry               | 10 fM-1 nM                                                                         | 9.2 fM                                               | 64 |
| CHA& Nt.BsmAI                                                   | HIV DNA                         | Fluorescent               | 10-500 pM                                                                          | 2.6 pM                                               | 65 |
| CHA& Nt.BbvCI                                                   | P53 gene,<br>cancer cells       | Fluorescent               | 5 pM-2 nM (p53 gene), $1 \times 10^2$ -<br>$1 \times 10^4$ cells/mL (cancer cells) | 0.9 pM (p53 gene),<br>100 cells/mL (cancer<br>cells) | 66 |
| CHA& CRISPR-Cas9                                                | MicroRNA                        | Fluorescent               | 1 pM-10 nM                                                                         | 23.5 fM                                              | 67 |
| CHA&CRISPR-<br>Cas13a                                           | Dengue virus                    | Electrochemistry          | 5 fM-50 nM                                                                         | 0.78 fM                                              | 68 |
| CHA&CRISPR-<br>Cas13a                                           | MicroRNA-21                     | Electrochemistry          | 10 fM-1 nM                                                                         | 2.6 fM                                               | 69 |

**Table S3.** CHA-based biosensors for bioimaging and biomedicine

| Application                                      | Target                                    | Method                                                      | Nanomaterials                                                          | Ref                         |    |
|--------------------------------------------------|-------------------------------------------|-------------------------------------------------------------|------------------------------------------------------------------------|-----------------------------|----|
| Cell surface <i>in situ</i> imaging              | ATP, target DNA, proton                   | bCHA                                                        | Not used                                                               | 70                          |    |
| Cell surface imaging                             | Target cancer cell                        | LCHA&HCR                                                    | Not used                                                               | 71                          |    |
| Intracellular imaging                            | MnSOD mRNA                                | CHA                                                         | Not used                                                               | 72                          |    |
| Intracellular <i>in situ</i> imaging             | Telomerase activity                       | CHA                                                         | Not used                                                               | 73                          |    |
| <i>In situ</i> imaging in living CTCs            | MicroRNA-21                               | CHA                                                         | Not used                                                               | 74                          |    |
| Intracellular imaging                            | Endogenous metal ions                     | CHA& DNAzyme                                                | Not used                                                               | 75                          |    |
| Intracellular <i>in situ</i> imaging             | MicroRNA-155                              | bCHA                                                        | Not used                                                               | 76                          |    |
| Intracellular imaging                            | MicroRNA-155                              | bCHA                                                        | Not used                                                               | 77                          |    |
| Intracellular imaging                            | MicroRNA-21                               | CHA&HCR                                                     | Not used                                                               | 48                          |    |
| Intracellular imaging                            | Polynucleotide kinase                     | CHA&HCR& $\lambda$<br>exonuclease                           | Not used                                                               | 78                          |    |
| Intracellular imaging                            | Telomerase activity                       | CHA&RCA                                                     | Not used                                                               | 79                          |    |
| Intracellular imaging                            | MicroRNA-21                               | CHA& DNAzyme                                                | Not used                                                               | 80                          |    |
| Intracellular imaging                            | MicroRNA-21                               | CHA& DNAzyme                                                | Not used                                                               | 81                          |    |
| Intracellular <i>in situ</i> imaging             | MicroRNA-21                               | CHA&CRISPR–Cas9                                             | Not used                                                               | 67                          |    |
| Intracellular imaging                            | MiRNA-21                                  | CHA&Glutathione                                             | AuNPs                                                                  | 82                          |    |
| Intracellular imaging of base-excision repairing | Human apurinic/aprimidinic endonuclease 1 | DNA walker fueled by<br>CHA                                 | AuNPs                                                                  | 83                          |    |
| Intracellular imaging                            | MiRNA-21                                  | 3D DNA walker based<br>on LCHA                              | AuNPs                                                                  | 84                          |    |
| Intracellular imaging                            | MiRNA-21                                  | CHA                                                         | AuNPs                                                                  | 85                          |    |
| Intracellular imaging                            | MiRNA-21                                  | CHA                                                         | AuNFs                                                                  | 86                          |    |
| Intracellular imaging                            | MiRNA-21, miRNA-155                       | CHA & 3D DNA walker                                         | Janus nanoparticles                                                    | 87                          |    |
| Intracellular SERS imaging                       | MicroRNA-1246                             | CHA                                                         | Au nanodumbbells (Au<br>NDs) & Au NPs                                  | 88                          |    |
| Intracellular SERS imaging                       | MiR-125a-5p                               | CHA                                                         | Gold nanocage                                                          | 89                          |    |
| Intracellular imaging                            | MiRNA-21                                  | CHA&double-channel<br>exciting single colour FL<br>(DCESCF) | UCNPs& AuNPs                                                           | 90                          |    |
| Intracellular imaging                            | MiRNA-21                                  | CHA                                                         | UCNPs                                                                  | 91                          |    |
| Intracellular imaging                            | MiRNA-21                                  | CHA&PC<br>molecular<br>switch                               | UCNPs                                                                  | 92                          |    |
| Intracellular imaging                            | MiRNA-21                                  | CHA                                                         | GO                                                                     | 93                          |    |
| Intracellular imaging                            | Circ-Foxo3                                | CHA&HCR                                                     | GO                                                                     | 94                          |    |
| Monitoring<br>Activity in Living Cells           | Telomerase                                | Telomerase activity                                         | CHA&DNAzyme                                                            | MnO <sub>2</sub> nanosheets | 38 |
| Intracellular imaging                            | MiRNA-21                                  | CHA                                                         | Near-infrared (NIR)<br>light-propelled<br>Janus-<br>based nanoplatform | 95                          |    |
| Intracellular imaging                            | Uracil DNA glycosylase                    | CHA&DNAzyme                                                 | MnO <sub>2</sub> nanosheets                                            | 96                          |    |

|                                                                                        |                                              |                                   |                                                 |     |
|----------------------------------------------------------------------------------------|----------------------------------------------|-----------------------------------|-------------------------------------------------|-----|
| Intracellular imaging                                                                  | MiRNA-20a                                    | CHA                               | Fe <sub>3</sub> O <sub>4</sub> @C nanoparticles | 97  |
| Intracellular imaging                                                                  | MiR-21                                       | LCHA                              | DNA nanowire                                    | 27  |
| Intracellular imaging                                                                  | MiR-21                                       | Dispersion-to-localization of CHA | DNA nanowire                                    | 98  |
| Intracellular imaging                                                                  | Survivin and TK1                             | Crosslinking CHA                  | DNA nanotetrad                                  | 99  |
| Intracellular imaging                                                                  | MiR-21                                       | LCHA                              | 3D DNA cubic structure                          | 29  |
| Intracellular imaging                                                                  | MnSOD mRNA                                   | LCHA                              | DNA tetrahedron                                 | 30  |
| Intracellular imaging                                                                  | MiRNA-21, miRNA-155                          | CHA&DNAzyme                       | 3D DNA scaffold                                 | 100 |
| Intracellular imaging                                                                  | MiR-155                                      | CHA                               | Tetrahedral DNA frameworks                      | 101 |
| Intracellular and <i>in vivo</i> imaging                                               | MiRNA-34a                                    | Cascade CHA                       | Not used                                        | 19  |
| Intracellular and <i>in vivo</i> imaging                                               | Survivin mRNA                                | CHA                               | Y scaffold                                      | 102 |
| Intracellular and <i>in vivo</i> imaging                                               | MiR-21, let7a                                | CHA                               | DNA nanolantern                                 | 103 |
| <i>in vivo</i> monitoring of drug-induced liver injury                                 | MiR122                                       | CHA&glutathione                   | UCNPs and gold nanorods                         | 104 |
| Imaging of microRNA and targeted drug delivery                                         | Let-7a                                       | CHA                               | DNA Nanohydrogels                               | 105 |
| Intracellular imaging and photothermal therapy                                         | Survivin mRNA                                | CHA                               | Gold nanorods                                   | 106 |
| Intracellular imaging and gene silencing                                               | GalNAc-T mRNA, human early growth response-1 | CHA& DNAzyme                      | Not used                                        | 107 |
| <i>In vivo</i> magnetic resonance imaging (MRI), mRNAs silencing, photodynamic therapy | MiR-21                                       | CHA&DNAzyme                       | Poly (D,L-lactic-co-glycolic acid) nanocarrier  | 108 |
| Intracellular Imaging and Photodynamic-Photothermal Combination Therapy                | Telomerase                                   | CHA                               | Carbon Nanocage/Fe <sub>3</sub> O <sub>4</sub>  | 109 |



## Reference

- 1 H. He, J. Dai, Y. Meng, Z. Duan, C. Zhou, B. Zheng, J. Du, Y. Guo and D. Xiao, *Talanta*, 2018, **179**, 641-645.
- 2 C. Park, Y. Song, K. Jang, C.-H. Choi and S. Na, *Sens. Actuators B*, 2018, **261**, 497-504.
- 3 J. Wen, J. Chen, L. Zhuang and S. Zhou, *Biosens. Bioelectron.*, 2016, **79**, 656-660.
- 4 W. Yun, J. Jiang, D. Cai, P. Zhao, J. Liao and G. Sang, *Biosens. Bioelectron.*, 2016, **77**, 421-427.
- 5 A. Ebrahimi, H. Ravan and M. Mehrabani, *Biosens. Bioelectron.*, 2020, **170**, 112710.
- 6 H. Ravan, A. Norouzi, N. Sanadgol and E. Hosseinzadeh, *Mikrochim Acta*, 2020, **187**, 1-8.
- 7 Z. Qing, X. He, J. Huang, K. Wang, Z. Zou, T. Qing, Z. Mao, H. Shi and D. He, *Anal. Chem.*, 2014, **86**, 4934-4939.
- 8 J. Chen and S. Zhou, *Biosens. Bioelectron.*, 2016, **77**, 277-283.
- 9 Y. Xu, N. Geng, X. Zheng, X. Luo, M. Wu and H. Zhang, *J. Pharm. Biomed. Anal.*, 2018, **161**, 393-398.
- 10 X. Li, J. Xie, B. Jiang, R. Yuan and Y. Xiang, *ACS Appl. Mater. Interfaces*, 2017, **9**, 5733-5738.
- 11 W. Yun, W. Xiong, H. Wu, M. Fu, Y. Huang, X. Liu and L. Yang, *Sens. Actuators B*, 2017, **249**, 493-498.
- 12 R. Y. Zhang, S. H. Luo, X. M. Lin, X. M. Hu, Y. Zhang, X. H. Zhang, C. M. Wu, L. Zheng and Q. Wang, *Anal. Chim. Acta*, 2021, **1157**, 338396.
- 13 H. Ravan, M. Amandadi and S. Esmaeili-Mahani, *Anal. Chem.*, 2017, **89**, 6021-6028.
- 14 Y. Kitamura, A. Nozaki, R. Ozaki, Y. Katsuda and T. Ihara, *ACS Appl. Bio Mater.*, 2019, **2**, 2988-2993.
- 15 K. Zhang, N. Gan, Z. Shen, J. Cao, F. Hu and T. Li, *Biosens. Bioelectron.*, 2019, **130**, 139-146.
- 16 H. He, J. Dai, Z. Duan, Y. Meng, C. Zhou, Y. Long, B. Zheng, J. Du, Y. Guo and D. Xiao, *Biosens. Bioelectron.*, 2016, **86**, 985-989.
- 17 W. Cheng, Y. Zhang, H. Yu, W. Diao, F. Mo, B. Wen, W. Cheng and Y. Yan, *Sens. Actuators B*, 2018, **255**, 3298-3304.
- 18 L. Zhu, M. Zhang, J. Ye, M. Yan, Q. Zhu, J. Huang and X. Yang, *Anal. Chem.*, 2020, **92**, 8614-8622.
- 19 K. Guk, S. G. Hwang, J. Lim, H. Y. Son, Y. Choi, Y. M. Huh, T. Kang, J. Jung and E. K. Lim, *Chem. Commun.*, 2019, **55**, 3457-3460.
- 20 S. Wang, X. Li, B. Jiang, R. Yuan and Y. Xiang, *Sens. Actuators B*, 2019, **298**, 126929.
- 21 S. Yue, T. Zhao, H. Qi, Y. Yan and S. Bi, *Biosens. Bioelectron.*, 2017, **94**, 671-676.
- 22 J. Dai, H. He, Z. Duan, Y. Guo and D. Xiao, *Anal. Chem.*, 2017, **89**, 11971-11975.
- 23 J. Dai, Z. Duan, M. Cao, M. Hao, H. He and D. Xiao, *Talanta*, 2018, **181**, 142-146.
- 24 J. Pan, L. Zeng and J. Chen, *Chem. Commun.*, 2019, **55**, 11932-11935.
- 25 L. Zhao, J. Mao, L. Hu, S. Zhang and X. Yang, *Anal. Methods*, 2021, **13**, 222-226.
- 26 H. He, J. Dai, G. Dong, H. Shi, F. Wang, Y. Qiu, R. Liao, C. Zhou, Y. Guo and D. Xiao, *Anal. Chem.*, 2019, **91**, 3043-3047.
- 27 Q. Wei, J. Huang, J. Li, J. Wang, X. Yang, J. Liu and K. Wang, *Chem. Sci.*, 2018, **9**, 7802-7808.
- 28 J. Wu, Y. Tian, L. He, J. Zhang, Z. Huang, Z. Luo and Y. Duan, *Analyst*, 2021, **146**, 3041-3051.
- 29 L. Liu, Q. Rong, G. Ke, M. Zhang, J. Li, Y. Li, Y. Liu, M. Chen and X. B. Zhang, *Anal. Chem.*, 2019, **91**, 3675-3680.
- 30 Z. Qing, J. Hu, J. Xu, Z. Zou, Y. Lei, T. Qing and R. Yang, *Chem. Sci.*, 2019, **11**, 1985-1990.
- 31 Y. Zhang, X. Zhang, B. Situ, Y. Wu, S. Luo, L. Zheng and Y. Qiu, *Biosens. Bioelectron.*, 2021, **183**, 113205.
- 32 Y. Zhang, X. Li, Z. Xu, Y. Chai, H. Wang and R. Yuan, *Chem. Commun.*, 2018, **54**, 10148-10151.
- 33 J. Li, J. Liu, Y. Bi, M. Sun, J. Bai and M. Zhou, *Anal. Chim. Acta*, 2020, **1105**, 87-94.
- 34 W. Zhou, W. Liang, X. Li, Y. Chai, R. Yuan and Y. Xiang, *Nanoscale*, 2015, **7**, 9055-9061.
- 35 J. Luo, Y. Xu, J. Huang, S. Zhang, Q. Xu and J. He, *Mikrochim Acta*, 2017, **185**, 1-6.
- 36 Y. Yuan, Y. Ma, L. Luo, Q. Wang, J. Huang, J. Liu, X. Yang and K. Wang, *Mikrochim Acta*, 2019, **186**, 1-6.
- 37 X. Liu, X. Zhou, X. Xia and H. Xiang, *Anal. Chim. Acta*, 2020, **1096**, 159-165.
- 38 H. Fan, H. Bai, Q. Liu, H. Xing, X. B. Zhang and W. Tan, *Anal. Chem.*, 2019, **91**, 13143-13151.
- 39 E. Xiong, D. Zhen, L. Jiang and X. Zhou, *Anal. Chem.*, 2019, **91**, 15317-15324.
- 40 W. Zhang, H. Xu, X. Zhao, X. Tang, S. Yang, L. Yu, S. Zhao, K. Chang and M. Chen, *Anal. Chim. Acta*, 2020, **1122**, 39-47.
- 41 Y. Zhang, J. Zhao, G. Yang, Y. He, S. Chen and R. Yuan, *ACS Appl. Mater. Interfaces*, 2021, **13**, 32013-32021.
- 42 D. Li, W. Cheng, Y. Li, Y. Xu, X. Li, Y. Yin, H. Ju and S. Ding, *Anal. Chem.*, 2016, **88**, 7500-7506.
- 43 W. Li, Y. Wu, Y. Jin, J. Wang and H. Gao, *Sens. Actuators B*, 2020, **305**, 127474.
- 44 Z. Fu, T. Lv, L. Jiang, C. Xing and C. Lu, *Talanta*, 2021, **233**, 122600.
- 45 L. Ge, W. Wang, T. Hou and F. Li, *Biosens. Bioelectron.*, 2016, **77**, 220-226.
- 46 D. Zhang, C. Wu, C. Luan, P. Gao, H. Wang, J. Chi and T. Kong, *Mikrochim Acta*, 2020, **187**, 1-7.
- 47 Y. H. Cheng, H. Tang, R. Q. Yu and J. H. Jiang, *Analyst*, 2020, **145**, 486-4866.
- 48 H. Wang, C. Li, X. Liu, X. Zhou and F. Wang, *Chem. Sci.*, 2018, **9**, 5842-5849.

- 49 X. Peng, Z. Z. Yang, P. Yang, Y. Q. Chai, W. B. Liang, Z. H. Li and R. Yuan, *Chem. Commun.*, 2020, **56**, 10215-10218.
- 50 L. P. Jia, Z. Feng, R. N. Zhao, R. N. Ma, W. Zhang, L. Shang, W. L. Jia and H. S. Wang, *Analyst*, 2020, **145**, 3605-3611.
- 51 Y. Zhao, J. Xiang, H. Cheng, X. Liu and F. Li, *Biosens. Bioelectron.*, 2021, **194**, 113581.
- 52 F. Jin and D. Xu, *Anal. Chem.*, 2021, **93**, 11617-11625.
- 53 Y. Chu, A. P. Deng, W. Wang and J. J. Zhu, *Anal. Chem.*, 2019, **91**, 3619-3627.
- 54 C. Song, J. Zhang, Y. Liu, X. Guo, Y. Guo, X. Jiang and L. Wang, *Sens Actuators B Chem*, 2020, **325**, 128970.
- 55 E. Xiong, X. Yan, X. Zhang, Y. Li, R. Yang, L. Meng and J. Chen, *Analyst*, 2018, **143**, 2799-2806.
- 56 H. Zhou, K. Ding, B. Li, H. Wang, N. Zhang and J. Liu, *Anal. Chim. Acta*, 2021, **1186**, 339123.
- 57 S. Bi, S. Yue, Q. Wu and J. Ye, *Biosens. Bioelectron.*, 2016, **83**, 281-286.
- 58 S. Wang, S. Lu, J. Zhao, J. Ye, J. Huang and X. Yang, *Biosens. Bioelectron.*, 2019, **126**, 565-571.
- 59 W. Song, Q. Zhang and W. Sun, *Chem. Commun.*, 2015, **51**, 2392-2395.
- 60 E. Xiong and L. Jiang, *Analyst*, 2019, **144**, 634-640.
- 61 C. Feng, C. Zhang, J. Guo, G. Li, B. Ye and L. Zou, *Anal. Chim. Acta*, 2021, **1176**, 338781.
- 62 Q. Y. Zhou, R. N. Ma, C. L. Hu, F. Sun, L. P. Jia, W. Zhang, L. Shang, Q. W. Xue, W. L. Jia and H. S. Wang, *Analyst*, 2021, **146**, 2705-2711.
- 63 S. Yu, Y. Wang, L. P. Jiang, S. Bi and J. J. Zhu, *Anal. Chem.*, 2018, **90**, 4544-4551.
- 64 H. Zhang, K. Wang, S. Bu, Z. Li, C. Ju and J. Wan, *Mol. Cell. Probes*, 2018, **38**, 13-18.
- 65 G. Dong, J. Dai, L. Jin, H. Shi, F. Wang, C. Zhou, B. Zheng, Y. Guo and D. Xiao, *Anal. Methods*, 2019, **11**, 2537-2541.
- 66 Z. Luo, Y. Xu, Z. Huang, J. Chen, X. Wang, D. Li, Y. Li and Y. Duan, *Talanta*, 2020, **210**, 120638.
- 67 Y. Liu, S. Li, L. Zhang, Q. Zhao, N. Li and Y. Wu, *RSC Adv.*, 2020, **10**, 28037-28040.
- 68 J. Wang, Q. Xia, J. Wu, Y. Lin and H. Ju, *Anal. Chim. Acta*, 2021, **1187**, 339131.
- 69 Y. Cui, S. Fan, Z. Yuan, M. Song, J. Hu, D. Qian, D. Zhen, J. Li and B. Zhu, *Talanta*, 2021, **224**, 121878.
- 70 Z. Tian, P. Peng, H. Wang, J. Zheng, L. Shi and T. Li, *Anal. Chem.*, 2020, **92**, 10357-10364.
- 71 J. Wang, J. Li, S. Liu, X. Meng, X. Yang, J. Huang and K. Wang, *Chem. Commun.*, 2020, **56**, 11267-11270.
- 72 C. Wu, S. Cansiz, L. Zhang, I. T. Teng, L. Qiu, J. Li, Y. Liu, C. Zhou, R. Hu, T. Zhang, C. Cui, L. Cui and W. Tan, *J. Am. Chem. Soc.*, 2015, **137**, 4900-4903.
- 73 L. Yan, J. Hui, Y. Liu, Y. Guo, L. Liu, L. Ding and H. Ju, *Biosens. Bioelectron.*, 2016, **86**, 1017-1023.
- 74 C. Xu, X. Y. He, X. H. Ren and S. X. Cheng, *Biosens. Bioelectron.*, 2021, **190**, 113401.
- 75 Z. Wu, H. Fan, N. S. R. Satyavolu, W. Wang, R. Lake, J. H. Jiang and Y. Lu, *Angew. Chem. Int. Ed.*, 2017, **56**, 8721-8725.
- 76 S. Yue, X. Song, W. Song and S. Bi, *Chem. Sci.*, 2019, **10**, 1651-1658.
- 77 X. Li, F. Yang, C. Gan, R. Yuan and Y. Xiang, *Biosens. Bioelectron.*, 2022, **197**, 113809.
- 78 J. Shang, S. Yu, Y. Chen, Y. Gao, C. Hong, F. Li and F. Wang, *Anal. Chem.*, 2021, **93**, 15559-15566.
- 79 Y. Liu, S. Li, L. Zhang, Q. Zhao, N. Li and Y. Wu, *ACS Omega*, 2020, **5**, 11836-11841.
- 80 L. Yang, Q. Wu, Y. Chen, X. Liu, F. Wang and X. Zhou, *ACS Sens.*, 2019, **4**, 110-117.
- 81 L. Zou, Q. Wu, Y. Zhou, X. Gong, X. Liu and F. Wang, *Chem. Commun.*, 2019, **55**, 6519-6522.
- 82 D. Li, Y. Wu, C. Gan, R. Yuan and Y. Xiang, *Nanoscale*, 2018, **10**, 17623-17628.
- 83 M. M. Lv, J. W. Liu, R. Q. Yu and J. H. Jiang, *Chem. Sci.*, 2020, **11**, 10361-10366.
- 84 X. J. Yang, M. R. Cui, X. L. Li, H. Y. Chen and J. J. Xu, *Chem. Commun.*, 2020, **56**, 2135-2138.
- 85 J. Wang, J. Huang, K. Quan, J. Li, Y. Wu, Q. Wei, X. Yang and K. Wang, *Chem. Commun.*, 2018, **54**, 10336-10339.
- 86 J. Liu, P. Du, J. Zhang, H. Shen and J. Lei, *Chem. Commun.*, 2018, **54**, 2550-2553.
- 87 Z. Yang, X. Peng, P. Yang, Y. Zhuo, Y. Q. Chai, W. Liang and R. Yuan, *Chem. Sci.*, 2020, **11**, 8482-8488.
- 88 C. Liu, C. Chen, S. Li, H. Dong, W. Dai, T. Xu, Y. Liu, F. Yang and X. Zhang, *Anal. Chem.*, 2018, **90**, 10591-10599.
- 89 Z. Wang, J. Xue, C. Bi, H. Xin, Y. Wang and X. Cao, *Analyst*, 2019, **144**, 7250-7262.
- 90 K. Zhang, S. Song, L. Yang, Q. Min, X. Wu and J. J. Zhu, *Chem. Commun.*, 2018, **54**, 13131-13134.
- 91 M. Huo, S. Li, P. Zhang, Y. Feng, Y. Liu, N. Wu, H. Ju and L. Ding, *Anal. Chem.*, 2019, **91**, 3374-3381.
- 92 X. Zhao, L. Zhang, W. Gao, X. Yu, W. Gu, W. Fu and Y. Luo, *ACS Appl. Mater. Interfaces*, 2020, **12**, 35958-35966.
- 93 H. Liu, T. Tian, D. Ji, N. Ren, S. Ge, M. Yan and J. Yu, *Biosens. Bioelectron.*, 2016, **85**, 909-914.
- 94 H. Li, B. Zhang, X. He, L. Zhu, L. Zhu, M. Yang, K. Huang, H. Luo and W. Xu, *Anal. Chim. Acta*, 2021, **1183**, 338966.
- 95 F. Lin, Y. Shao, Y. Wu and Y. Zhang, *ACS Appl. Mater. Interfaces*, 2021, **13**, 3713-3721.
- 96 X. Song, Q. Ding, J. Zhang, R. Sun, L. Yin, W. Wei, Y. Pu and S. Liu, *Anal. Chem.*, 2021, **93**, 13687-13693.
- 97 Y. Fan, Y. Liu, Q. Zhou, H. Du, X. Zhao, F. Ye and H. Zhao, *Talanta*, 2021, **223**, 121675.
- 98 H. Bai, Y. Yan, D. Li, N. Fan, W. Cheng, W. Yang, H. Ju, X. Li and S. Ding, *Biosens. Bioelectron.*, 2021, **198**, 113821.
- 99 D. J. Huang, T. Cao, Z. M. Huang, Z. Wu, L. J. Tang and J. H. Jiang, *Chem. Commun.*, 2019, **55**,

- 3899-3902.
- 100 X. Li, F. Yang, C. Gan, R. Yuan and Y. Xiang, *Anal. Chem.*, 2021, **93**, 9912-9919.
- 101 Y. Wang, Y. Bai, L. P. Cao, L. L. Li, L. Zhan, H. Zuo, C. M. Li and C. Z. Huang, *Biosens. Bioelectron.*, 2021, **197**, 113783.
- 102 H. Wu, W. J. Zhou, L. Liu, Z. Fan, H. Tang, R. Q. Yu and J. H. Jiang, *Chem. Commun.*, 2020, **56**, 8782-8785.
- 103 Y. X. Wang, D. X. Wang, J. Wang, B. Liu, A. N. Tang and D. M. Kong, *Talanta*, 2022, **236**, 122846.
- 104 L. Meng, X. Zheng, Z. Zheng, Z. Zhao, L. Wang, P. Zhou, G. Z. Xin, P. Li and H. J. Li, *Nanoscale*, 2020, **12**, 15325-15335.
- 105 S. Bi, B. Xiu, J. Ye and Y. Dong, *ACS Appl. Mater. Interfaces*, 2015, **7**, 23310-23319.
- 106 F. X. Su, C. X. Yang and X. P. Yan, *Anal. Chem.*, 2017, **89**, 7277-7281.
- 107 J. J. Li, W. N. Li, W. F. Du, M. M. Lv, Z. K. Wu and J. H. Jiang, *Chem. Commun.*, 2018, **54**, 10626-10629.
- 108 X. Gong, R. Li, J. Wang, J. Wei, K. Ma, X. Liu and F. Wang, *Angew. Chem. Int. Ed.*, 2020, **59**, 21648-21655.
- 109 F. Shen, C. Zhang, Z. Cai, J. Wang, X. Zhang, J. O. Machuki, L. Cui, S. Li and F. Gao, *ACS Appl. Mater. Interfaces*, 2020, **12**, 53624-53633.
